# Supplementary material
Source: Research Square preprint supplement (doi:10.21203/rs.3.rs-9504292/v1)
Supplement: Supplementary file 1 [file ae2128b560a95c4a629752bd.docx]

**Table S1.** Summary of genetic diversity parameters for European ground squirrel (*Spermophilus citellus*) populations from the Czech Republic, based on 12 microsatellite loci. Populations are grouped into zoo (ex situ) and free-living (in situ) categories. Na = mean number of alleles per locus; Ar = allelic richness; Ho = observed heterozygosity; He = expected heterozygosity; FIS = inbreeding coefficient. Significant FIS values (P < 0.05) are indicated by an asterisk.

|  | Pop | Na | Ar | Ho | He | FIS |
| --- | --- | --- | --- | --- | --- | --- |
| Zoo | Hluboká | 2.5 | 1.976 | 0.376 | 0.34 | -0,097* |
| Prague | 2.75 | 2.171 | 0.433 | 0.398 | -0,078 |
| Rozovy | 2.917 | 2.242 | 0.484 | 0.453 | -0,067* |
| Brno | 3.083 | 2.377 | 0.629 | 0.49 | -0,266* |
| Free living | Karlovy Vary | 2.5 | 2.001 | 0.427 | 0.345 | -0,159* |
| Písečný vrch | 2.167 | 2.052 | 0.488 | 0.394 | -0,228 |
| Hodkovice nad Mohelkou | 1.667 | 1.667 | 0.375 | 0.289 | -0,279 |
| Radouč | 1.833 | 1.684 | 0.259 | 0.263 | 0,024 |
